# Supplementary material for: Breast cancer anti-estrogen resistance 3 inhibits transforming growth factor β/Smad signaling and associates with favorable breast cancer disease outcomes
Source: Springer Nature journal article supplement (doi:10.1186/s13058-014-0476-9), 2014-12-12

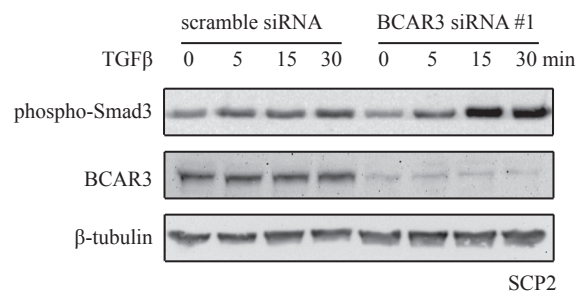

Supplement: MOESM3 [file 9781246]
